# Supplementary material for: Preparation, growth mechanism, size manipulation and near-infrared luminescence enhancement of β-NaYF4:Nd3+ microcrystals via Ca2+ doping
Source: Royal Society of Chemistry journal article supplement (doi:10.1039/c8ce01924j), 2018-12-17
Supplement: c8ce01924j1.pdf [file c8ce01924j1.pdf]

# Preparation, growth mechanism, size manipulation and near-infrared luminescence enhancement of $\beta$ -NaYF<sub>4</sub>:Nd<sup>3+</sup> microcrystals via Ca<sup>2+</sup> doping

Qinqin Shao,<sup>a</sup> Hong Zhang,<sup>\*a</sup> Jiangyun Dai,<sup>b</sup> Chao Yang,<sup>a</sup> Xiaoxu Chen,<sup>a</sup> Guoying Feng<sup>\*a</sup> and Shouhuan Zhou<sup>a, c</sup>

<sup>a</sup> Institute of Laser and Micro/Nano Engineering, Collee of Electronics and Information Engineering, Sichuan University, Chengdu 610064, China.

<sup>b</sup> Laser Fusion Research Center, China Academy of Engineering Physics (CAEP), Mianyang 621900, China.

<sup>c</sup> North China Research Institute of Electro-Optics, Beijing 100015, China.

\*Correspondence authors

E-mail: zh\_qy@scu.edu.cn (Hong Zhang).

E-mail: guoing\_feng@scu.edu.cn (Guoying Feng).

**Table S1.** Nominal and ICP-AES measured results of cation mole ratios in the  $\beta$ -NaYF<sub>4</sub>:3% Nd<sup>3+</sup> samples doped with 0-30 mol% Ca<sup>2+</sup> ions.

| NaYF <sub>4</sub> : 3Nd/ xCa | Na : Y : Nd : Ca              |                               |
|------------------------------|-------------------------------|-------------------------------|
|                              | Nominal ratio                 | ICP-AES results               |
| x = 0                        | 1.000 : 0.970 : 0.030         | 1.019 : 0.968 : 0.032         |
| x = 5                        | 1.000 : 0.920 : 0.030 : 0.050 | 0.990 : 0.912 : 0.034 : 0.054 |
| x = 10                       | 1.000 : 0.870 : 0.030 : 0.100 | 0.991 : 0.861 : 0.033 : 0.106 |
| x = 20                       | 1.000 : 0.770 : 0.030 : 0.200 | 1.001 : 0.768 : 0.029 : 0.203 |
| x = 25                       | 1.000 : 0.720 : 0.030 : 0.250 | 1.012 : 0.722 : 0.031 : 0.247 |
| x = 30                       | 1.000 : 0.670 : 0.030 : 0.300 | 0.998 : 0.671 : 0.027 : 0.302 |

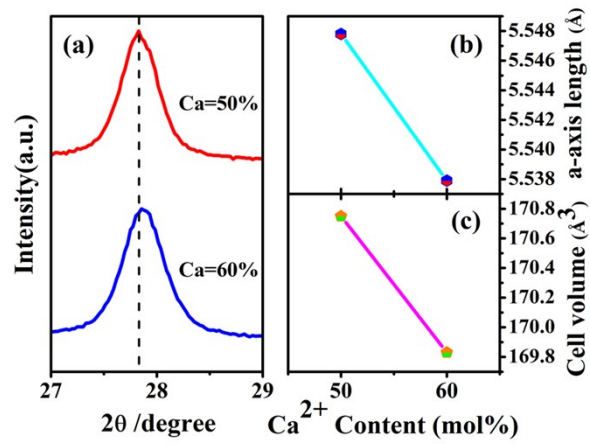

**Fig. S1** (a) Amplified XRD patterns of (111) peak for CaF<sub>2</sub> doped with 50 mol % and 60 mol% Ca<sup>2+</sup>; the variation trend of a-axis length (b) and cell volume (c) of CaF<sub>2</sub> doped with 50 mol % and 60 mol% Ca<sup>2+</sup>.
